# Supplementary material
Source: Springer Nature journal article supplement (https://www.springermedizin.de/resource/supplementary/12943_2006_163_MOESM11_ESM.pdf/9553580)

**A**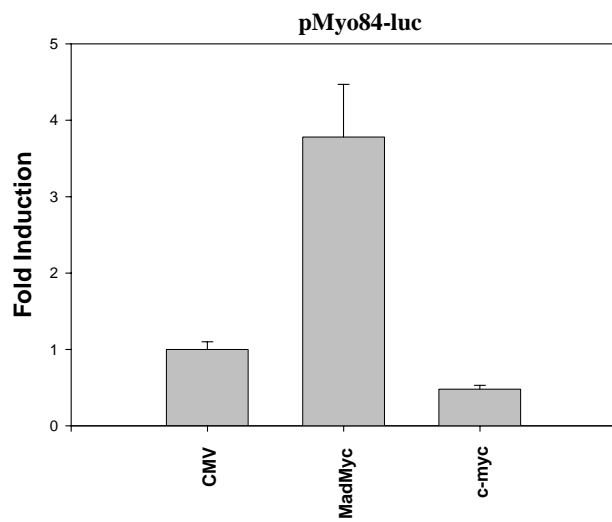**B**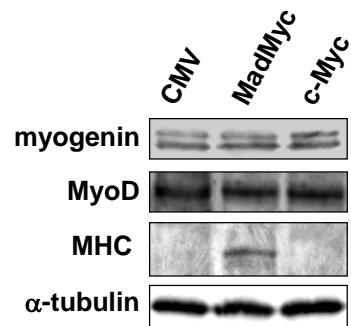**C**

CMV MadMyc c-Myc

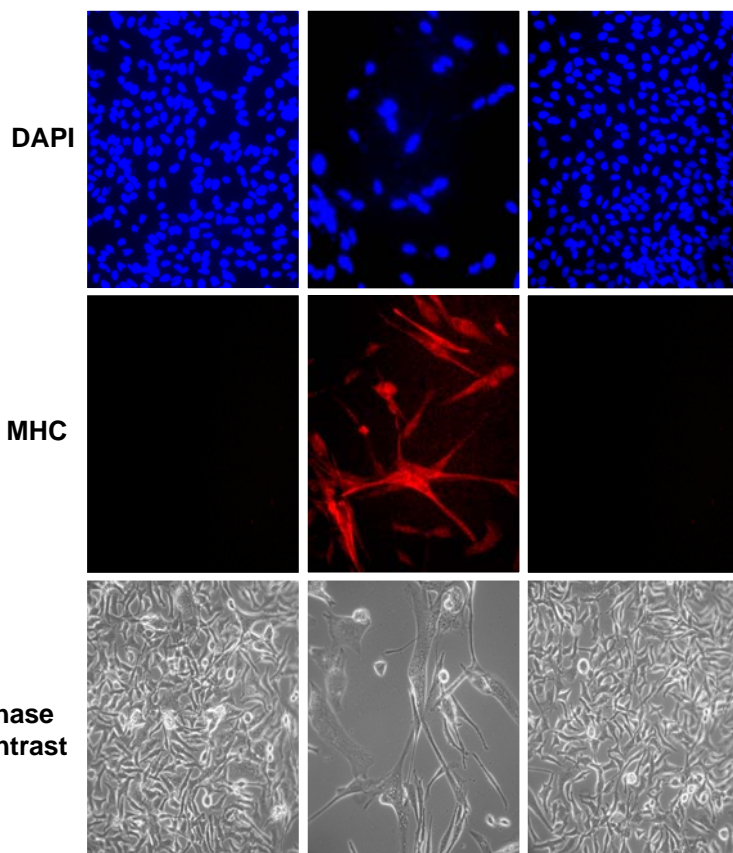

Supplement: MOESM11 [file 9553580]
